# Supplementary material
Source: PubMed Central journal article supplement (PMC6711613)

1 **Supplementary Table 1 Composition of diets (AOAC, 1984)**

| Diet      | Basal diet        | Type of diet     | Basal diet        | Diet       | Basal diet        |
|-----------|-------------------|------------------|-------------------|------------|-------------------|
| Component | Quantity (g/100g) | Component        | Quantity (g/100g) | Component  | Quantity (g/100g) |
| Starch    | 53                | Vitamin mixture  | 1.0               | Fat        | 7.0               |
| Casein    | 20                | Mineral mixture  | 3.5               | Cellulose  | 5.0               |
| Sucrose   | 10                | Choline chloride | 0.2               | Methionine | 0.3               |

2 **Composition of vitamin mixture**

| Vitamin mixture  | Quantity (mg/100 gm) | Vitamin mixture   | Quantity (mg/100 gm) | Vitamin mixture         | Quantity (mg/100 gm) |
|------------------|----------------------|-------------------|----------------------|-------------------------|----------------------|
| Vitamin A        | 2000 IU              | Ca-D-Pantothenate | 4.0 mg               | Mesoinositol            | 10 mg                |
| Vitamin D        | 200 IU               | Riboflavin        | 0.8 mg               | Niacin                  | 4.0 mg               |
| Vitamin K        | 0.5 mg               | Thiamin-HCl       | 0.5 mg               | Biotin                  | 0.04 mg              |
| Choline chloride | 200 mg               | Pyridoxin-HCl     | 0.5 mg               | Vitamin B <sub>12</sub> | 0.003 mg             |
| PABA             | 10 mg                | Folic acid        | 0.2 mg               |                         |                      |

3 **Composition of mineral mixture**

| Salt Mixture                    | Quantity (gm/kg) | Salt Mixture                         | Quantity (gm/kg) | Salt Mixture                         | Quantity (gm/kg) |
|---------------------------------|------------------|--------------------------------------|------------------|--------------------------------------|------------------|
| KH <sub>2</sub> PO <sub>4</sub> | 389gm            | ZnSO <sub>4</sub> .7H <sub>2</sub> O | 0.548 gm         | FeSO <sub>4</sub> .7H <sub>2</sub> O | 27gm             |
| MgSO <sub>4</sub>               | 57.3 gm          | CuSO <sub>4</sub> .5H <sub>2</sub> O | 0.477 gm         | MnSO <sub>4</sub> .H <sub>2</sub> O  | 4.1 gm           |
| CaCO <sub>3</sub>               | 381.4gm          | CoCl <sub>2</sub> .6H <sub>2</sub> O | 0.023 gm         | NaCl                                 | 139.3 gm         |
| KI                              | 0.79 gm          |                                      |                  |                                      |                  |

4

5

6  
7

Supplementary Table 2

| S. No. | Groups | Basal Diet* | Treatment* | Zinc <sup>#</sup> | Duration of Treatment                                                                                      |
|--------|--------|-------------|------------|-------------------|------------------------------------------------------------------------------------------------------------|
| 1      | BD     | 200g        | NA         | NA                | Every day up to 3 weeks after zinc deficiency along with triple distilled drinking water <i>ad libitum</i> |
| 2      | MILK   | 100g        | 100g       | NA                | Every day up to 3 weeks after zinc deficiency along with triple distilled drinking water <i>ad libitum</i> |
| 3      | DAHI   | 100g        | 100g       | NA                | Every day up to 3 weeks after zinc deficiency along with triple distilled drinking water <i>ad libitum</i> |
| 4      | ZED    | 100g        | 100g       | 15ppm             | Every day up to 3 weeks after zinc deficiency along with triple distilled drinking water <i>ad libitum</i> |
| 5      | ZEP    | 100g        | 100g       | 15ppm             | Every day up to 3 weeks after zinc deficiency along with triple distilled drinking water <i>ad libitum</i> |
| 6      | ZS     | 200g        | NA         | 15ppm             | Every day up to 3 weeks after zinc deficiency along with triple distilled drinking water <i>ad libitum</i> |

8  
9

**Note:**

10 \*Per kg body weight  
11 <sup>#</sup>Per 100g of diet

12

13 **BD:** As per the AOAC Supplementary table 1

14 **Milk:** Whole milk containing 13% total solids (TS). [TS= Fat 4% + SNF 9%].

15 **DAHI:** Culture used for dahi preparation-*Streptococcus thermophilus* NCDC074 which contains approx.0.9 % of lactic acid as per the titration method.

17 **ZED:** Culture used for dahi preparation-*Streptococcus thermophilus* NCDC074 enriched with zinc (please refer material and method section for zinc enrichment)

19 **ZEP:** Culture used for probiotic dahi preparation *Lactobacillus rhamnosus* NCDC 610 and *Streptococcus thermophilus* NCDC074 enriched with zinc (please refer material and method section for zinc enrichment)

22

23

24

25

26

27

28 **Supplementary Table 3. *Lactobacillus fermentum* SR4 biomass and zinc content**

| <b>Trials</b> | <b>Biomass obtained (g)</b> | <b>Zinc content (mg/ g)</b> |
|---------------|-----------------------------|-----------------------------|
| <b>1</b>      | 36.5                        | 1.69                        |
| <b>2</b>      | 36.4                        | 1.69                        |
| <b>3</b>      | 37.1                        | 1.69                        |
| <b>Total</b>  | 110                         | 1.69                        |

29  
30  
31  
32  
33  
34  
35  
36  
37  
38  
39  
40

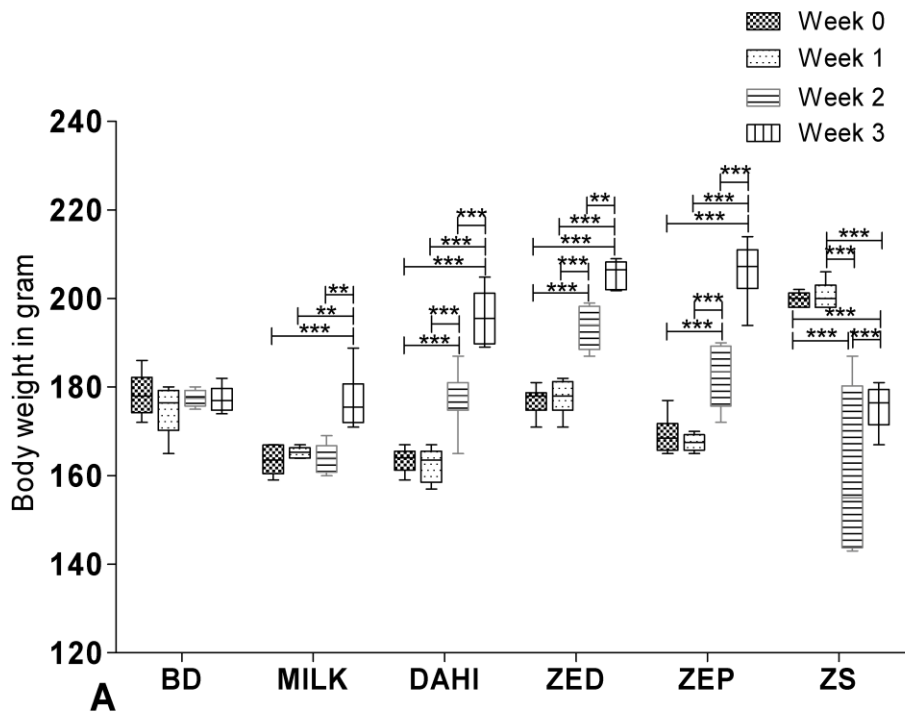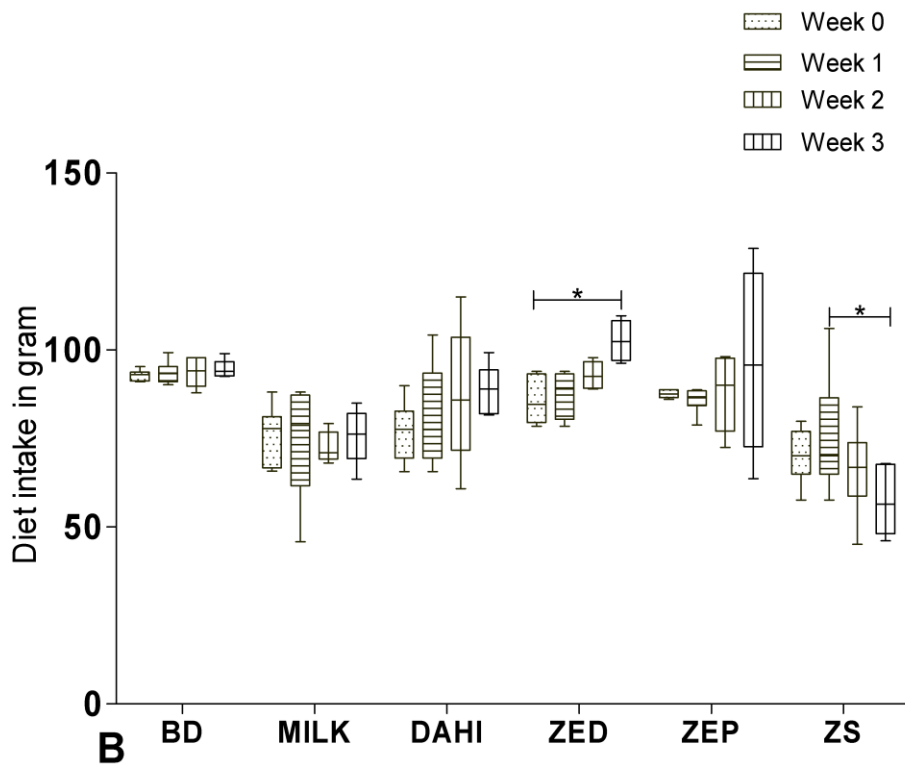

41

42

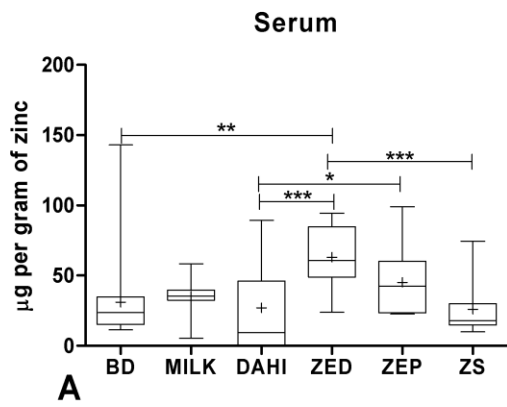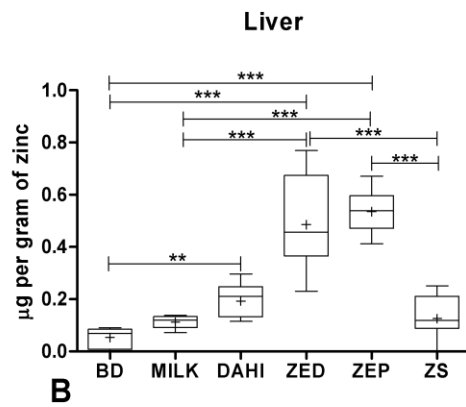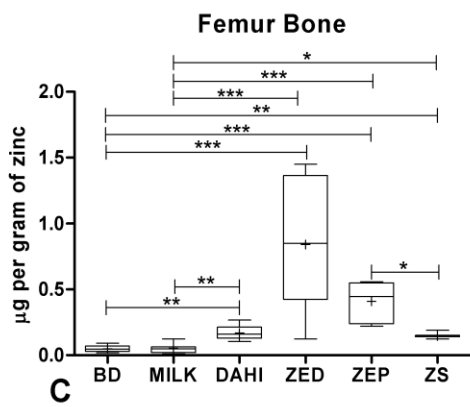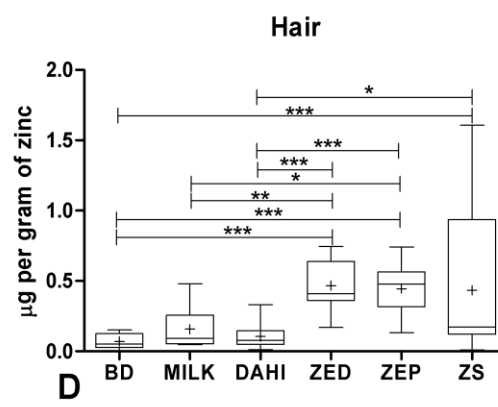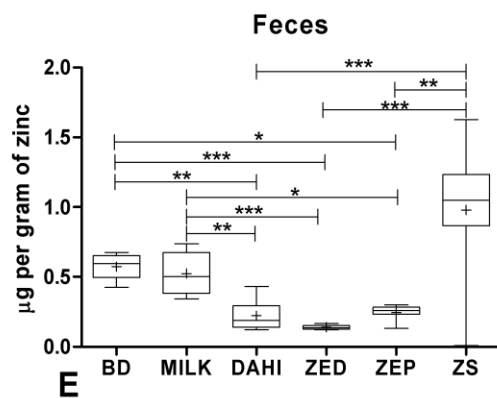

Supplement: NIHMS998629-supplement-Suppl_Tables.pdf [file NIHMS998629-supplement-Suppl_Tables.pdf]
